# Supplementary material for: Janus films with stretchable and waterproof properties for wound care and drug delivery applications
Source: Royal Society of Chemistry journal article supplement (doi:10.1039/c6ra16232k), 2016-01-01
Supplement: c6ra16232k1.pdf [file c6ra16232k1.pdf]

## Supporting Information

### Janus Films with Stretchable and Water Proof Properties for Wound Care and Drug Delivery Applications

Ethan Lee, Hongbin Zhang\*, John K. Jackson, Chinten James Lim and Mu Chiao\*

**Table S1.** Drugs and their corresponding weights in the evaluation of antimicrobial activity. The descriptions shown here correspond to the representative Kirby-Bauer assays shown in Figure 6a. On plates containing thin or thick PDMS films, Kan and/or Amp filter paper discs were included as controls.

| Position<br>No. | <i>S. aureus</i>           |                         |                          | <i>E. coli</i>             |                         |                          |
|-----------------|----------------------------|-------------------------|--------------------------|----------------------------|-------------------------|--------------------------|
|                 | Filter paper<br>(Drug, mg) | Thin film<br>(Drug, mg) | Thick film<br>(Drug, mg) | Filter paper<br>(Drug, mg) | Thin film<br>(Drug, mg) | Thick film<br>(Drug, mg) |
| 1               | BAC 0.00                   | BAC 0.00                | BAC 0.00                 | BAC 0.00                   | BAC 0.00                | BAC 0.00                 |
| 2               | BAC 0.05                   | BAC 0.05                | BAC 0.10                 | BAC 0.05                   | BAC 0.05                | BAC 0.10                 |
| 3               | BAC 0.10                   | BAC 0.10                | BAC 0.20                 | BAC 0.10                   | BAC 0.10                | BAC 0.20                 |
| 4               | BAC 0.15                   | BAC 0.15                | BAC 0.30                 | BAC 0.15                   | BAC 0.15                | BAC 0.30                 |
| 5               | BAC 0.20                   | BAC 0.30                | BAC 0.60                 | BAC 0.20                   | BAC 0.30                | BAC 0.60                 |
| 6               | BAC 0.30                   | —                       | —                        | BAC 0.30                   | —                       | —                        |
| 7               | BAC 0.60                   | Kan 0.10                | Kan 0.10                 | BAC 0.60                   | Kan 0.10                | Kan 0.10                 |
| 8               | Kan 0.10                   | Amp 0.01                | Amp 0.01                 | —                          | —                       | —                        |
| 9               | Amp 0.01                   | —                       | —                        | Kan 0.10                   | —                       | —                        |
